# Supplementary material for: The penultimate deglaciation: protocol for Paleoclimate Modelling Intercomparison Project (PMIP) phase 4 transient numerical simulations between 140 and 127 ka, version 1.0
Source: Copernicus journal article supplement (doi:10.5194/gmd-12-3649-2019), 2019-08-22
Supplement: Supplementary file 1 [file gmd-12-3649-2019-supplement.zip]

## **List of Supplementary Tables**

1. Table S1= Dating and record alignment strategy of North Atlantic and Mediterranean Sea sediment cores
2. Table S2= Tie points defined between Corchia speleothem Mg record and the ODP976 SST record to build a coherent temporal framework.
3. Table S3= Tahiti corals sea-level data (Thomas et al., 2009), and recalculated ages (Hibbert et al., 2016) using new decay constants (Cheng et al., 2013)
4. Table S4= Huon peninsula corals sea-level data (Esat et al., 1999; Stein et al., 1993) and recalculated ages (Hibbert et al., 2016) using new decay constants (Cheng et al., 2013)
5. Table S5= List of the new tie points (this study) to construct the revised chronology of the Red Sea RSL record (Grant et al., 2012)

## 1 Corchia Cave chronology and Mg/Ca

The Corchia cave age model of Drysdale et al. (2009) was revised by updating the decay constants (Cheng et al., 2013) and rerunning the age model algorithm (Drysdale et al., 2005). This shifts the time evolution by no more than 0.5 ka across the PDG.

The Corchia Cave Mg time series is from a subaqueous speleothem (CD3) collected from the same gallery as the stalagmite (CC5) from which the Corchia  $\delta^{18}\text{O}$  series has been produced. Magnesium concentrations in speleothems usually fluctuate according to changes in cave hydrology (i.e. rainfall), with lower concentrations (or lower Mg/Ca) registering periods of high recharge and high Mg concentrations (or higher Mg/Ca) corresponding to periods of low recharge (Fairchild and Baker, 2012; Drysdale et al., 2006). However, low-resolution (1 mm)  $\delta^{18}\text{O}$  and Mg analysis of CD3 spanning the last four glacial-interglacial cycles shows that changes in Mg concentration follow orbital-scale temperature patterns, with higher Mg values occurring during interglacials and lower values during glacials (Figure S1). We attribute this pattern, a highly unusual phenomenon for speleothems, to the very deep location of the cave (400 m below the ground surface) and the subaqueous environment of speleothem growth, both of which would promote exceptionally slow growth rates (Drysdale et al., 2012), which in turn seems conducive to calcite precipitation at or near thermodynamic equilibrium. This has recently been shown by CD3 oxygen isotope ratios, whose water-calcite fractionation falls on the same trajectory as that for Devils Hole vein calcite (Coplen, 2007), a similarly slow-depositing speleothem. For this current study, we carried out high-resolution measurements of  $\delta^{18}\text{O}$  and Mg across the PDG section of CD3, and anchored the CD3 chronology to CC5 by synchronising their  $\delta^{18}\text{O}$  profiles. This enabled the Mg series of CD3 to be placed on the U-Th chronology of the 2018 Corchia Cave stalagmite stack (CCSS18, Tzedakis et al. (2018)).

## 2 Chronologies of marine sediment cores from the North Atlantic and the Mediterranean Sea during the Penultimate Deglaciation

The chronology of all sites during the PDG has been revised here. We use as a reference for the PDG the radiometrically-dated time scale from Corchia Cave (Italy) speleothems (Tzedakis et al., 2018). This time scale has been transferred to the western Mediterranean ODP 976 site, by aligning its SST record to the Corchia Mg record. Using the same approach, we transferred this time scale to sites MD01-2444 and MD95-2042 from the Portuguese margin, for which benthic stable isotopes

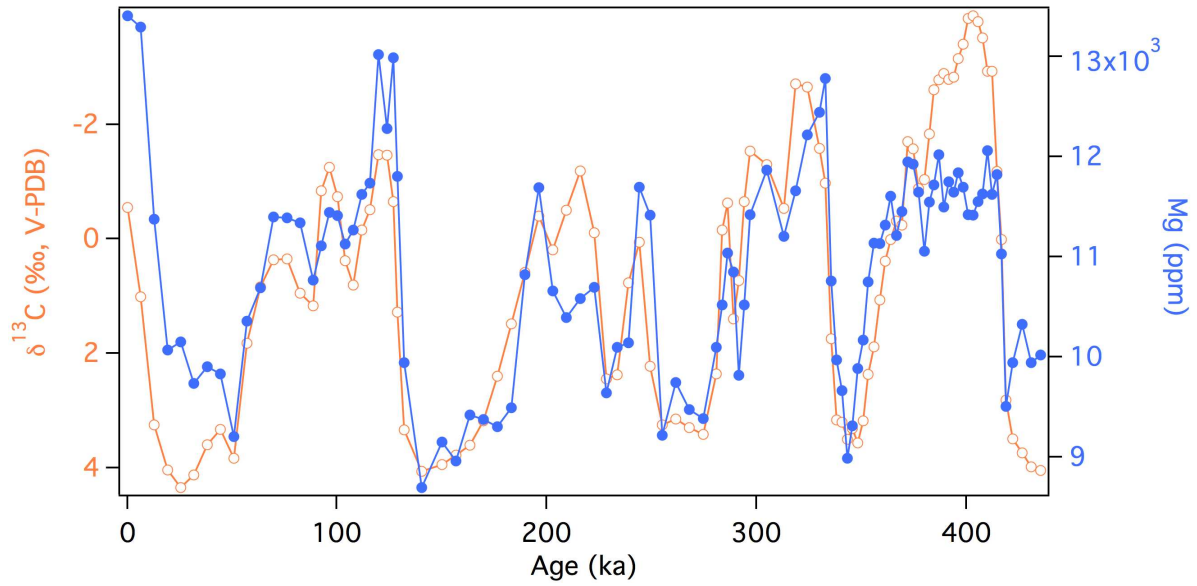

**Figure S1.** Low-resolution reconnaissance Mg concentrations and  $\delta^{13}\text{C}$  from subaqueous speleothem CD3, cored from the same chamber in Corchia Cave from where stalagmite CC5 was collected. The Mg shows strong coherence with  $\delta^{13}\text{C}$  ( $R=0.76$ , statistically significant at  $p<0.05$ ), which is a proxy for temperature-driven changes in biogenic soil  $\text{CO}_2$  (Drysedale et al., 2007). High values of Mg are associated with interglacials (Marine Isotope Stages (MIS) 1, 5, 7, 9 and 11), whilst low values occur during glacials (MIS 2-4, 6, 8, 10 and 12). The positive association between Mg values and warmth implies that Mg is acting as a classic palaeothermometer in this speleothem.

are available. The chronologies of other marine sites were then progressively revised during the PDG, by aligning both their benthic  $\delta^{18}\text{O}$  and SST records to those of cores MD95-2042 and ODP976, respectively (see Table S1). Aligning the Iberian margin SST reconstructions onto the Corchia Mg record leads to a start of the PDG main SST increase  $\sim 3$  ka younger than when the SST alignment is based on the Corchia  $\delta^{18}\text{O}$  record (Drysedale et al., 2009). The new PDG chronologies agree within

5 2 ka (not shown) with ages defined independently via the SST alignment to ice core records on AICC2012 time scale (e.g. Govin et al., 2015), supporting the chronological strategy adopted here.

| Core      | Latitude | Longitude | Water-depth | Alignment strategy for the PDG (140-127 ka)                                                                                                                                           |
|-----------|----------|-----------|-------------|---------------------------------------------------------------------------------------------------------------------------------------------------------------------------------------|
| ODP 976   | 36.20°N  | 4.31°W    | 1108 m      | Alignment of ODP976 alkenone SST to U-series dated Corchia Mg                                                                                                                         |
| MD95-2042 | 37.80°N  | 10.17°W   | 3146 m      | Alignment of MD95-2042 alkenone SST to U-series dated Corchia Mg                                                                                                                      |
| MD95-2010 | 66.70°N  | 4.57°E    | 1226 m      | Alignment of MD95-2010 benthic $\delta^{18}\text{O}$ to MD95-2042 benthic $\delta^{18}\text{O}$ on Corchia time scale                                                                 |
| ODP984    | 61.43°N  | 24.08°W   | 1649 m      | Alignment of ODP984 <i>N. pachyderma</i> left percentages to ODP976 SST on Corchia time scale on Corchia time scale (agreement checked with MD95-2042 benthic $\delta^{18}\text{O}$ ) |
| ODP983    | 60.40°N  | 23.64°W   | 1984 m      | Alignment of ODP983 <i>N. pachyderma</i> left percentages to ODP976 SST on Corchia time scale on Corchia time scale (agreement checked with MD95-2042 benthic $\delta^{18}\text{O}$ ) |
| ODP980    | 55.80°N  | 14.11°W   | 2180 m      | Alignment of ODP980 benthic $\delta^{18}\text{O}$ to MD95-2042 benthic $\delta^{18}\text{O}$ on Corchia time scale                                                                    |
| U1308     | 49.88°N  | 24.24°W   | 3883 m      | Alignment of U1308 benthic $\delta^{18}\text{O}$ to MD95-2042 benthic $\delta^{18}\text{O}$ on Corchia time scale                                                                     |
| CH69-K09  | 41.76°N  | 47.35°W   | 4100 m      | Alignment of CH69-K09 benthic $\delta^{18}\text{O}$ and $\delta^{13}\text{C}$ to MD95-2042 benthic $\delta^{18}\text{O}$ and $\delta^{13}\text{C}$ on Corchia time scale              |
| SU90-03   | 40.51°N  | 32.05°W   | 2475 m      | Alignment of SU90-03 SST to ODP976 SST on Corchia time scale (agreement checked with MD95-2042 benthic $\delta^{18}\text{O}$ )                                                        |
| MD01-2444 | 37.56°N  | 10.14°W   | 2637 m      | Alignment of MD01-2444 alkenone SST to U-series dated Corchia Mg                                                                                                                      |
| ODP 1063  | 33.69°N  | 57.62°W   | 4584 m      | Alignment of ODP1063 <i>N. pachyderma</i> left percentages to ODP976 SST on Corchia time scale (agreement checked with MD95-2042 benthic $\delta^{18}\text{O}$ )                      |

**Table S1.** Alignment strategies used to define the chronologies of North Atlantic and Mediterranean Sea cores for the period 140-127 ka.

## References

- Cheng, H., Edwards, R. L., Shen, C.-C., Polyak, V. J., Asmerom, Y., Woodhead, J., Hellstrom, J., Wang, Y., Kong, X., Spötl, C., Wang, X., and Alexander, E. C.: Improvements in 230Th dating, 230Th and 234U half-life values, and U-Th isotopic measurements by multi-collector inductively coupled plasma mass spectrometry, *Earth and Planetary Science Letters*, 371-372, 82–91, <https://doi.org/https://doi.org/10.1016/j.epsl.2013.04.006>, <http://www.sciencedirect.com/science/article/pii/S0012821X13001878>, 2013.
- Chutcharavan, P., Dutton, A., and Ellwood, M.: Seawater 234U/238U recorded by modern and fossil corals, *Geochimica et Cosmochimica Acta*, 224, 1–17, <https://doi.org/https://doi.org/10.1016/j.gca.2017.12.017>, <http://www.sciencedirect.com/science/article/pii/S0016703717307937>, 2018.
- Coplen, T. B.: Calibration of the calcite-water oxygen-isotope geothermometer at Devils Hole, Nevada, a natural laboratory, *Geochimica et Cosmochimica Acta*, 71, 3948 – 3957, <https://doi.org/https://doi.org/10.1016/j.gca.2007.05.028>, <http://www.sciencedirect.com/science/article/pii/S0016703707003043>, 2007.
- Drysdale, R., Zanchetta, G., Hellstrom, J., Fallick, A., and Zhao, J.-X.: Stalagmite evidence for the onset of the Last Interglacial in southern Europe at  $129 \pm 1$  ka, *Geophysical Research Letters*, 32, <https://doi.org/10.1029/2005GL024658>, <https://agupubs.onlinelibrary.wiley.com/doi/abs/10.1029/2005GL024658>, 2005.
- Drysdale, R., Zanchetta, G., Hellstrom, J., Maas, R., Fallick, A., Pickett, M., Cartwright, I., and Piccini, L.: Late Holocene drought responsible for the collapse of Old World civilizations is recorded in an Italian cave flowstone, *Geology*, 34, 101, <https://doi.org/10.1130/G22103.1>, <http://dx.doi.org/10.1130/G22103.1>, 2006.
- Drysdale, R., Zanchetta, G., Hellstrom, J., Fallick, A., McDonald, J., and Cartwright, I.: Stalagmite evidence for the precise timing of North Atlantic cold events during the early last glacial, *Geology*, 35, 77–80, 2007.
- Drysdale, R., Hellstrom, J., Zanchetta, G., Fallick, A., Sanchez-Goni, M., Couchoud, I., McDonald, J., Maas, R., Lohmann, G., and I. Isola: Evidence for Obliquity Forcing of Glacial Termination II, *Science*, 325, 1527–1531, 2009.

- Drysdale, R. N., Paul, B. T., Hellstrom, J. C., Couchoud, I., Greig, A., Bajo, P., Zanchetta, G., Isola, I., Spötl, C., Banerjee, I., Regattieri, E., and Woodhead, J. D.: Precise microsampling of poorly laminated speleothems for U-series dating, *Quaternary Geochronology*, 14, 38 – 47, <https://doi.org/https://doi.org/10.1016/j.quageo.2012.06.009>, <http://www.sciencedirect.com/science/article/pii/S187110141200146X>, 2012.
- 5 Esat, T. M., McCulloch, M. T., Chappell, J., Pillans, B., and Omura, A.: Rapid Fluctuations in Sea Level Recorded at Huon Peninsula During the Penultimate Deglaciation, *Science*, 283, 197–201, <https://doi.org/10.1126/science.283.5399.197>, <http://science.sciencemag.org/content/283/5399/197>, 1999.
- Fairchild, I. and Baker, A.: *Speleothem Science: From process to past environments*, Wiley-Blackwell, 2012.
- Govin, A., Capron, E., Tzedakis, P., Verheyden, S., Ghaleb, B., Hillaire-Marcel, C., St-Onge, G., Stoner, J., Bassinot, F., Bazin, L., Blunier, T., Combourieu-Nebout, N., Ouahabi, A. E., Genty, D., Gersonde, R., Jimenez-Amat, P., Landais, A., Martrat, B., Masson-Delmotte, V., Parrenin, F., Seidenkrantz, M.-S., Veres, D., Waelbroeck, C., and Zahn, R.: Sequence of events from the onset to the demise of the Last Interglacial: Evaluating strengths and limitations of chronologies used in climatic archives, *Quaternary Science Reviews*, 129, 1–36, 2015.
- 10 Grant, K., Rohling, E., Bar-Matthews, M., Ayalon, A., Medina-Elizalde, M., Ramsey, C. B., Satow, C., and Roberts, A.: Rapid coupling between ice volume and polar temperature over the past 150,000 years, *Nature*, 491, 744–747, <https://doi.org/doi:10.1038/nature11593>, 2012.
- 15 Hibbert, F. D., Rohling, E. J., Dutton, A., Williams, F. H., Chutcharavan, P. M., Zhao, C., and Tamisiea, M. E.: Coral indicators of past sea-level change: A global repository of U-series dated benchmarks, *Quaternary Science Reviews*, 145, 1 – 56, <https://doi.org/https://doi.org/10.1016/j.quascirev.2016.04.019>, <http://www.sciencedirect.com/science/article/pii/S0277379116301305>, 2016.
- 20 Stein, M., Wasserburg, G., Aharon, P., Chen, J., Zhu, Z., Bloom, A., and Chappell, J.: TIMS U-series dating and stable isotopes of the last interglacial event in Papua New Guinea, *Geochimica et Cosmochimica Acta*, 57, 2541 – 2554, [https://doi.org/10.1016/0016-7037\(93\)90416-T](https://doi.org/10.1016/0016-7037(93)90416-T), 1993.
- Thomas, A. L., Henderson, G. M., Deschamps, P., Yokoyama, Y., Mason, A. J., Bard, E., Hamelin, B., Durand, N., and Camoin, G.: Penultimate Deglacial Sea-Level Timing from Uranium/Thorium Dating of Tahitian Corals, *Science*, 324, 1186–1189, <https://doi.org/10.1126/science.1168754>, <http://science.sciencemag.org/content/324/5931/1186>, 2009.
- 25 Tzedakis, P., Drysdale, R., Margari, V., Skinner, L., Menviel, L., Rhodes, R. H., Taschetto, A. S., Hodell, D. A., Crowhurst, S. J., Hellstrom, J. C., Fallick, A. E., Grimalt, J. O., McManus, J. F., Martrat, B., Mokeddem, Z., Parrenin, F., Regattieri, E., Roe, K., and Zanchetta, G.: Enhanced climate instability in the North Atlantic and southern Europe during the Last Interglacial, *Nature Communications*, 9, 4235, 2018.

# ODP976 tie points

**Table S2**

| Tie-points         |                  |                                                  | Over an interval of $\pm 500$ years around the tie-point age |                                          | Arbitrarily fixed to 400 years | Fixed to 500 years               |                                  |                                  |                                  |                                  |
|--------------------|------------------|--------------------------------------------------|--------------------------------------------------------------|------------------------------------------|--------------------------------|----------------------------------|----------------------------------|----------------------------------|----------------------------------|----------------------------------|
| ODP976 depth (mcd) | Corchia age (ka) | Comment                                          | Resolution of aligned ODP record (ka)                        | Resolution of target Corchia record (ka) | Matching error (ka)            | Matching error CC Mg onto CC 18O | Abs age uncert -2 $\sigma$ (kyr) | Abs age uncert +2 $\sigma$ (kyr) | Final -2 $\sigma$ age error (ka) | Final +2 $\sigma$ age error (ka) |
| 39.66              | 127.85           | Aligning SST to Corchia Mg                       | 0.07016541                                                   | 0.07                                     | 0.40                           | 0.50                             | -0.64                            | 0.68                             | -0.95                            | -0.94                            |
| 40.26              | 129.35           | Aligning SST to Corchia Mg                       | 0.05                                                         | 0.08                                     | 0.40                           | 0.50                             | -0.48                            | 0.62                             | -0.84                            | -0.90                            |
| 40.63              | 130.31           | Aligning SST to Corchia Mg                       | 0.07                                                         | 0.08                                     | 0.40                           | 0.50                             | -0.79                            | 1.16                             | -1.05                            | -1.33                            |
| 41.02              | 132.17           | Aligning SST to Corchia Mg                       | 0.06                                                         | 0.37                                     | 0.40                           | 0.50                             | -1.41                            | 1.39                             | -1.61                            | -1.57                            |
| 41.82              | 133.74           | Aligning G. bulloides d18O to Corchia d18O stack | 0.07                                                         | 0.15                                     | 0.40                           | 0.50                             | -1.34                            | 1.35                             | -1.52                            | -1.51                            |
| 42.23              | 135.79           | Aligning SST to Corchia Mg                       | 0.09                                                         | 0.63                                     | 0.40                           | 0.50                             | -1.90                            | 2.00                             | -2.12                            | -2.19                            |
| 42.60              | 137.35           | Aligning SST to Corchia Mg                       | 0.08                                                         | 0.32                                     | 0.40                           | 0.50                             | -1.91                            | 1.59                             | -2.06                            | -1.74                            |
| 44.19              | 143.01           | Aligning SST to Corchia Mg                       | 0.09                                                         | 0.14                                     | 0.40                           | 0.50                             | -1.04                            | 1.09                             | -1.26                            | -1.27                            |

**Table S3****TAHITI***Data from Thomas et al., (2009), and re-calculated ages from Hibbert et al., (2016)*

| Sample ID                | Elevation (m) | Corr Elev (m) | Age (ka) | 2 $\sigma$ uncert (ka) | $\delta^{234}\text{U}$ init (‰) | 2 $\sigma$ uncert (‰) | Screened Ages (ka) | Avg Age per coral (ka) | 2 $\sigma$ uncert per coral (ka) | Corr Elev per coral (m) |
|--------------------------|---------------|---------------|----------|------------------------|---------------------------------|-----------------------|--------------------|------------------------|----------------------------------|-------------------------|
| 310-M0005D-20R-2W-0,21   | -117.52       | -84.47        | 132.2    | 0.9                    | 148.8                           | 1.2                   | 132.2              | 136.9                  | 0.4                              | -83.3                   |
| 310-M0005D-20R-2W-0,21   | -117.52       | -83.09        | 137.7    | 0.4                    | 148.6                           | 1.1                   | 137.7              |                        |                                  |                         |
| 310-M0005D-20R-2W-14,21  | -117.66       | -84.31        | 133.4    | 1.0                    | 157.5                           | 1.2                   |                    |                        |                                  |                         |
| 310-M0005D-20R-2W-14,21  | -117.66       | -84.26        | 133.6    | 0.4                    | 148.2                           | 1.1                   | 133.6              | 133.6                  | 0.4                              | -84.3                   |
| 310-M0009D-25R-1W-64,70  | -145.82       | -108.83       | 148.0    | 0.9                    | 144.6                           | 1.2                   | 148.0              | 148.0                  | 0.9                              | -108.8                  |
| 310-M0009D-25R-1W-95,102 | -146.13       | -109.76       | 145.5    | 0.9                    | 164.4                           | 1.2                   |                    |                        |                                  |                         |
| 310-M0009D-25R-2W-41,49  | -146.95       | -108.82       | 152.5    | 0.7                    | 143.0                           | 0.8                   | 152.5              | 152.7                  | 0.4                              | -108.8                  |
| 310-M0009D-25R-2W-41,49  | -146.95       | -108.76       | 152.8    | 0.5                    | 144.2                           | 1.2                   | 152.8              |                        |                                  |                         |
| 310-M0009D-25R-2W-52,55  | -147.06       | -108.78       | 153.1    | 0.7                    | 144.8                           | 0.8                   | 153.1              | 153.2                  | 0.4                              | -108.8                  |
| 310-M0009D-25R-2W-52,55  | -147.06       | -108.75       | 153.2    | 0.5                    | 144.3                           | 1.2                   | 153.2              |                        |                                  |                         |
| 310-M0019A-27R-1W-62,83  | -115.24       | -81.98        | 133.0    | 0.4                    | 149.9                           | 1.1                   | 133.0              | 133.0                  | 0.3                              | -82.0                   |
| 310-M0019A-27R-1W-62,83  | -115.24       | -81.98        | 133.1    | 0.9                    | 151.1                           | 1.4                   | 133.1              |                        |                                  |                         |
| 310-M0019A-27R-1W-62,83  | -115.24       | -81.76        | 133.9    | 0.4                    | 149.5                           | 1.1                   | 133.9              |                        |                                  |                         |
| 310-M0019A-29R-1W-0,4    | -117.61       | -83.50        | 136.5    | 0.9                    | 150.5                           | 1.4                   | 136.5              | 137.5                  | 0.4                              | -83.2                   |
| 310-M0019A-29R-1W-0,4    | -117.61       | -83.19        | 137.7    | 0.4                    | 150.5                           | 1.1                   | 137.7              |                        |                                  |                         |
| 310-M0019A-29R-1W-16,24  | -117.77       | -84.05        | 134.9    | 0.9                    | 170.1                           | 1.4                   |                    |                        |                                  | -117.8                  |
| 310-M0019A-29R-1W-16,24  | -117.77       | -83.83        | 135.8    | 0.4                    | 170.7                           | 1.1                   |                    |                        |                                  |                         |
| 310-M0019A-32R-1W-0,4    | -119.61       | -85.92        | 134.8    | 0.9                    | 155.8                           | 1.5                   |                    |                        |                                  | -119.6                  |
| 310-M0019A-32R-1W-0,4    | -119.61       | -85.40        | 136.8    | 0.4                    | 155.2                           | 1.1                   |                    |                        |                                  |                         |

**Table S3 legend (columns from left to right)**

**Col 1:** Sample ID for all individual measurements

**Col 2:** Elevation relative to mean sea level (MSL)

**Col 3:** Back-calculated elevation corrected for subsidence and using the Age in col. 6

**Col 4:** Age in thousands of years ago (ka), as re-calculated in Hibbert et al. (2016) using the decay constants of Cheng et al. (2013) for  $^{230}\text{Th}$  and  $^{234}\text{U}$

**Col 5:** 2-sigma age uncertainty, as reported in Hibbert et al. (2016)

**Col 6:** Initial  $\delta^{234}\text{U}$  value, back-calculated using the age in col. 4, as reported in Hibbert et al. (2016)

**Col 7:** 2-sigma uncertainty in initial  $\delta^{234}\text{U}$  value, as reported in Hibbert et al. (2016)

**Col 8:** Ages passing screening criteria (within 5 ‰ of modern seawater value = 145 ‰, Chutcharavan et al., (2018)

**Col 9:** Inverse-variance weighted means per coral of subsamples passing the screening criteria

**Col 10:** 2-sigma uncertainty of inverse variance-weighted means in col. 9

**Col 11:** Back-calculated elevation corrected for subsidence using the inverse-variance weighted means in col.9



Table S4

**HUON PENINSULA** (original data from Esat et al. (1999) and Stein et al. (1993)  
and re-calculated ages from Hibbert et al. (2016)).

| Sample ID     | Elevation (m) | Corr Elev (m) | Age (ka) | 2 $\sigma$ uncert (ka) | $\delta^{234}\text{U}$ init (‰) | 2 $\sigma$ uncert (‰) | Screened Ages (ka) | Avg Age per coral (ka) | 2 $\sigma$ uncert per coral (ka) | Corr Elev per coral (m) |
|---------------|---------------|---------------|----------|------------------------|---------------------------------|-----------------------|--------------------|------------------------|----------------------------------|-------------------------|
| AC-U10        | 142.7         | -66.4         | 134.1    | 0.6                    | 154.7                           | 2.7                   | 134.1              | 134.1                  | 0.6                              | -66.4                   |
| AC-U11-bottom | 142.7         | -56.9         | 127.9    | 0.3                    | 157.8                           | 1.3                   |                    |                        |                                  |                         |
| AC-U11a-top   | 142.7         | -53.7         | 125.9    | 0.4                    | 154.1                           | 1.3                   | 125.9              | 125.9                  | 0.4                              | -53.7                   |
| AC-U11b-top   | 142.7         | -53.8         | 126      | 1.1                    | 142.7                           | 4.0                   | 126.0              |                        |                                  |                         |
| AC-U13a       | 142.7         | -60.7         | 130.4    | 0.4                    | 154.6                           | 1.3                   | 130.4              | 130.4                  | 0.4                              | -60.7                   |
| AC-U13b       | 142.7         | -58.9         | 129.2    | 0.6                    | 159.8                           | 2.7                   |                    |                        |                                  |                         |
| AC-U14        | 142.7         | -60.4         | 130.2    | 0.6                    | 153.1                           | 2.7                   | 130.2              | 130.2                  | 0.6                              | -60.4                   |
| AC-U19        | 142.7         | -60.6         | 130.3    | 0.6                    | 156.0                           | 2.7                   | 130.3              | 130.3                  | 0.6                              | -60.6                   |
| AC-U21        | 142.7         | -61.8         | 131.1    | 0.6                    | 147.6                           | 2.7                   | 131.1              | <b>131.1</b>           | 0.6                              | -61.8                   |
| AC-U24        | 142.7         | -65.2         | 133.3    | 0.7                    | 150.0                           | 2.7                   | 133.3              | <b>133.3</b>           | 0.7                              | -65.2                   |
| HP-23         | 197           | -56.6         | 137.1    | 1.9                    | 154.6                           | 1.6                   | 137.1              | 137.1                  | 1.9                              | -56.6                   |
| Kanz-1p       | 139.9         | -83.6         | 143.2    | 0.9                    | 163.3                           | 2.7                   |                    |                        |                                  |                         |
| Kanz-U4       | 139.9         | -36.5         | 138.0    | 0.5                    | 162.4                           | 1.4                   |                    |                        |                                  |                         |
| Kwam-U4       | 170.8         | -84.5         | 138.0    | 0.5                    | 162.4                           | 1.4                   |                    |                        |                                  |                         |
| Kwam-U9p      | 170.8         | -70.5         | 130.4    | 0.8                    | 160.4                           | 2.7                   |                    |                        |                                  |                         |
| Kwan-U5       | 142.7         | -63.2         | 132.0    | 0.6                    | 139.3                           | 2.7                   | 132.0              | <b>132.0</b>           | 0.6                              | -63.2                   |
| Kwan-U9p      | 142.7         | -57.8         | 128.5    | 0.6                    | 145.1                           | 2.7                   | 128.5              | <b>128.5</b>           | 0.6                              | -57.8                   |
| HP-16-a       | 215           | -68.0         | 153.0    | 2.5                    | 193.8                           | 9.5                   |                    |                        |                                  |                         |
| HP-16-b       | 215           | -47.5         | 141.9    | 1.4                    | 190.8                           | 5.4                   |                    |                        |                                  |                         |
| HP-16-c       | 215           | -39.0         | 137.3    | 2.4                    | 183.9                           | 10.7                  |                    |                        |                                  |                         |
| HP-17         | 212           | -60.8         | 147.5    | 2.5                    | 174.2                           | 8.2                   |                    |                        |                                  |                         |
| HP-22         | 217           | -36.1         | 136.8    | 1.8                    | 150.0                           | 6.8                   | 136.8              | <b>136.8</b>           | 1.8                              | -36.1                   |
| HP-23-a       | 217           | -34.4         | 135.9    | 1.3                    | 143.8                           | 5.4                   | 135.9              | <b>134.5</b>           | 1.3                              | -34.4                   |
| HP-23-b       | 217           | -29.1         | 133.0    | 1.2                    | 146.9                           | 5.4                   | 133.0              |                        |                                  |                         |
| KIL-4         | 224           | -30.3         | 137.5    | 2.4                    | 164.9                           | 9.4                   |                    |                        |                                  |                         |
| SIAL-M-1      | 185           | -45.8         | 124.8    | 1.3                    | 180.4                           | 6.5                   |                    |                        |                                  |                         |
| SIAL-M-3      | 203           | -46.9         | 135.1    | 1.9                    | 160.9                           | 8.1                   | 135.1              | 135.1                  | 1.9                              | -46.9                   |

**Table S4 legend:**

**Col 1:** Sample ID for corals with ages between 125 and 150 ka

**col 2:** Elevation relative to mean sea level (MSL)

**col 3:** Back-calculated elevation corrected for uplift and using the Age in col. 4

**col 4:** Age in thousands of years ago (ka), as re-calculated in Hibbert et al. (2016)

using the decay constants of Cheng et al. (2013) for  $^{230}\text{Th}$  and  $^{234}\text{U}$

**col 5:** 2-sigma age uncertainty, as reported in Hibbert et al. (2016)

**col 6:** Initial  $\delta^{234}\text{U}$  value, back-calculated using the age in col. 4, as reported in Hibbert et al. (2016)

**col 7:** 2-sigma uncertainty in initial  $\delta^{234}\text{U}$  value, as reported in Hibbert et al. (2016)

**col. 8:** Ages passing screening criteria (within 10 ‰ of modern seawater value = 145 ‰, Chutcharavan et al. (2018)).

For comparison,  $\delta^{234}\text{U}$  data within 5 ‰ of modern seawater are denoted in bold font )

**col 9:** Inverse-variance weighted means per coral of subsamples passing the screening criteria

**col. 10:** 2-sigma uncertainty of inverse variance-weighted means in col.9

**col. 11:** Back-calculated elevation corrected for uplift using the inverse-variance weighted means in col.9

**Table S5****Cols. 1-3:** Red Sea SL from Grant et al (2012).**Col. 4:** Modified age model with tie points (in blue bold)

| Age<br>(ka BP) | RSL<br>data<br>(m) | ±2s<br>(ky)  | Proposed<br>Age Model<br>(ka) | Tie point<br>comment |
|----------------|--------------------|--------------|-------------------------------|----------------------|
| 0.0689059      | 0.74               | 0.070489009  | 0.0689059                     |                      |
| 0.221817       | 7.24               | 0.0740021324 | 0.221817                      |                      |
| 0.323748       | -2.28              | 0.0763439911 | 0.323748                      |                      |
| 0.476659       | -0.1               | 0.0798571123 | 0.476659                      |                      |
| 0.578597       | -6.19              | 0.0821991318 | 0.578597                      |                      |
| 0.731501       | 3.72               | 0.0857120921 | 0.731501                      |                      |
| 0.807953       | 8.11               | 0.0874685723 | 0.807953                      |                      |
| 0.83344        | -2.17              | 0.0880541346 | 0.83344                       |                      |
| 0.986344       | -0.81              | 0.0915670949 | 0.986344                      |                      |
| 1.07916        | -11.2              | 0.093699537  | 1.07916                       |                      |
| 1.08828        | 1.31               | 0.0939090685 | 1.08828                       |                      |
| 1.17077        | -2.51              | 0.0958042713 | 1.17077                       |                      |
| 1.2157         | 1.48               | 0.0968365354 | 1.2157                        |                      |
| 1.24119        | -2.32              | 0.0974221667 | 1.24119                       |                      |
| 1.26238        | 8.16               | 0.0979090057 | 1.26238                       |                      |
| 1.34312        | 2.025              | 0.0997640024 | 1.34312                       |                      |
| 1.35399        | -0.61              | 0.10001374   | 1.35399                       |                      |
| 1.41958        | -2.89              | 0.1015206663 | 1.41958                       |                      |
| 1.44559        | 1.49               | 0.1021182445 | 1.44559                       |                      |
| 1.53721        | 1.84               | 0.1042232086 | 1.53721                       |                      |
| 1.59797        | -4.81              | 0.105619166  | 1.59797                       |                      |
| 1.62881        | -0.27              | 0.1063277132 | 1.62881                       |                      |
| 1.6999         | -2.47              | 0.1079610017 | 1.6999                        |                      |
| 1.72042        | -1.32              | 0.1084324475 | 1.72042                       |                      |
| 1.81203        | 5.69               | 0.1105371818 | 1.81203                       |                      |
| 1.85281        | 4.02               | 0.1114740999 | 1.85281                       |                      |
| 1.90364        | 6.04               | 0.1126419161 | 1.90364                       |                      |
| 1.95475        | 4.91               | 0.1138161654 | 1.95475                       |                      |
| 1.99524        | 3.58               | 0.1147464207 | 1.99524                       |                      |
| 2.08686        | 10.25              | 0.1168513848 | 2.08686                       |                      |
| 2.10765        | -2.67              | 0.1173290338 | 2.10765                       |                      |
| 2.17846        | -1.61              | 0.1189558894 | 2.17846                       |                      |
| 2.20959        | -4.4               | 0.1196710993 | 2.20959                       |                      |
| 2.27007        | -2.83              | 0.1210606237 | 2.27007                       |                      |
| 2.36168        | -4.32              | 0.123165358  | 2.36168                       |                      |
| 2.36249        | 3.08               | 0.1231839677 | 2.36249                       |                      |
| 2.43895        | 6.96               | 0.1249406317 | 2.43895                       |                      |
| 2.45329        | -3.16              | 0.1252700923 | 2.45329                       |                      |
| 2.46443        | 0.63               | 0.1255260331 | 2.46443                       |                      |
| 2.54489        | -1.62              | 0.1273745969 | 2.54489                       |                      |
| 2.61734        | 0.09               | 0.1290391313 | 2.61734                       |                      |
| 2.6365         | -1.99              | 0.1294793312 | 2.6365                        |                      |
| 2.71927        | -5.46              | 0.131380967  | 2.71927                       |                      |
| 2.72811        | 0.76               | 0.1315840655 | 2.72811                       |                      |
| 2.81972        | -1                 | 0.1336887998 | 2.81972                       |                      |
| 2.87219        | -6.36              | 0.134894295  | 2.87219                       |                      |
| 2.91133        | -0.65              | 0.1357935342 | 2.91133                       |                      |
| 2.97412        | -2.05              | 0.1372361307 | 2.97412                       |                      |
| 3.00293        | -1.35              | 0.1378980387 | 3.00293                       |                      |

|         |        |              |         |
|---------|--------|--------------|---------|
| 3.09455 | -3.49  | 0.1400030028 | 3.09455 |
| 3.12703 | -1.34  | 0.1407492289 | 3.12703 |
| 3.18615 | -6.76  | 0.1421075074 | 3.18615 |
| 3.22897 | -3.85  | 0.1430912943 | 3.22897 |
| 3.27776 | 8.12   | 0.1442122417 | 3.27776 |
| 3.36937 | 1.8    | 0.146316976  | 3.36937 |
| 3.38187 | -6.25  | 0.1466041628 | 3.38187 |
| 3.45832 | 2.7    | 0.148360597  | 3.45832 |
| 3.46098 | 1.8    | 0.1484217103 | 3.46098 |
| 3.48381 | -12.52 | 0.1489462282 | 3.48381 |
| 3.55258 | 13.03  | 0.1505262149 | 3.55258 |
| 3.63671 | -7.22  | 0.1524590966 | 3.63671 |
| 3.69414 | -0.31  | 0.1537785475 | 3.69414 |
| 3.73865 | 1.32   | 0.1548011621 | 3.73865 |
| 3.83568 | 0.74   | 0.1570304206 | 3.83568 |
| 3.89155 | -8.76  | 0.1583140305 | 3.89155 |
| 3.97723 | -0.67  | 0.1602825235 | 3.97723 |
| 3.99349 | -9.47  | 0.160656096  | 3.99349 |
| 4.11878 | -5.62  | 0.1635346263 | 4.11878 |
| 4.1464  | -9.49  | 0.1641691942 | 4.1464  |
| 4.24834 | -6.81  | 0.1665112596 | 4.24834 |
| 4.26033 | -3.2   | 0.1667867292 | 4.26033 |
| 4.40124 | -13.47 | 0.1700241281 | 4.40124 |
| 4.40188 | -3.93  | 0.170038832  | 4.40188 |
| 4.47769 | -9.02  | 0.1717805623 | 4.47769 |
| 4.50318 | -3.39  | 0.1723661935 | 4.50318 |
| 4.54343 | -3.2   | 0.1732909349 | 4.54343 |
| 4.65608 | -10.71 | 0.175879062  | 4.65608 |
| 4.68498 | -4.37  | 0.1765430378 | 4.68498 |
| 4.75802 | -6.99  | 0.1782211274 | 4.75802 |
| 4.82653 | -11.67 | 0.1797951406 | 4.82653 |
| 4.91092 | -9.41  | 0.1817339959 | 4.91092 |
| 4.96807 | -21.11 | 0.1830470137 | 4.96807 |
| 5.01286 | -13.5  | 0.1840760613 | 5.01286 |
| 5.16577 | -13.43 | 0.1875891595 | 5.16577 |
| 5.25117 | -10.19 | 0.1895512194 | 5.25117 |
| 5.2677  | -3.39  | 0.1899309952 | 5.2677  |
| 5.39272 | -6.8   | 0.1928033223 | 5.39272 |
| 5.42062 | -12.32 | 0.1934443231 | 5.42062 |
| 5.49707 | -14.43 | 0.1952007574 | 5.49707 |
| 5.52255 | -2.84  | 0.1957861588 | 5.52255 |
| 5.53427 | 1.4    | 0.1960554252 | 5.53427 |
| 5.67546 | -10.09 | 0.199299257  | 5.67546 |
| 5.67582 | -15.62 | 0.199307528  | 5.67582 |
| 5.7774  | 0.24   | 0.2016413225 | 5.7774  |
| 5.81737 | -3.96  | 0.2025596309 | 5.81737 |
| 5.9303  | -11.16 | 0.2051541909 | 5.9303  |
| 5.95892 | -12.5  | 0.2058117337 | 5.95892 |
| 6.03224 | 2.47   | 0.2074962564 | 6.03224 |
| 6.10047 | 0.34   | 0.2090638366 | 6.10047 |
| 6.18514 | -11.31 | 0.2110091248 | 6.18514 |
| 6.24202 | -3.97  | 0.2123159394 | 6.24202 |
| 6.28708 | 0.56   | 0.2133511903 | 6.28708 |
| 6.38356 | -2.44  | 0.2155678126 | 6.38356 |
| 6.43998 | -7.74  | 0.2168640587 | 6.43998 |
| 6.51644 | -0.31  | 0.2186207227 | 6.51644 |
| 6.52511 | -13.28 | 0.2188199154 | 6.52511 |

|         |         |              |         |
|---------|---------|--------------|---------|
| 6.57135 | -10.43  | 0.2198822767 | 6.57135 |
| 6.66666 | -9.88   | 0.2220720183 | 6.66666 |
| 6.7684  | -4.38   | 0.2244094887 | 6.7684  |
| 6.80821 | -5.26   | 0.2253241211 | 6.80821 |
| 6.9478  | -3.97   | 0.2285311931 | 6.9478  |
| 6.94976 | 1.02    | 0.228576224  | 6.94976 |
| 7.04982 | -0.74   | 0.2308750966 | 7.04982 |
| 7.14988 | -12.12  | 0.2331739691 | 7.14988 |
| 7.21689 | -7.54   | 0.2347135199 | 7.21689 |
| 7.24994 | -24.08  | 0.2354728417 | 7.24994 |
| 7.35    | -28.07  | 0.2377717143 | 7.35    |
| 7.37853 | -10.94  | 0.2388581119 | 7.37853 |
| 7.41167 | -25.18  | 0.2401200544 | 7.41167 |
| 7.47334 | -17.35  | 0.2424683945 | 7.47334 |
| 7.535   | -10.24  | 0.2448163539 | 7.535   |
| 7.54437 | -8.83   | 0.2451731553 | 7.54437 |
| 7.59667 | -28.08  | 0.247164694  | 7.59667 |
| 7.65493 | -5.54   | 0.2493831843 | 7.65493 |
| 7.65834 | -29.14  | 0.2495130341 | 7.65834 |
| 7.72    | -4.01   | 0.2518609935 | 7.72    |
| 7.78167 | -5.29   | 0.2542093336 | 7.78167 |
| 7.82078 | -11.13  | 0.2556986085 | 7.82078 |
| 7.84334 | -26.97  | 0.2565576737 | 7.84334 |
| 7.9037  | -14.02  | 0.2588561302 | 7.9037  |
| 7.90501 | -23.39  | 0.2589060138 | 7.90501 |
| 7.93134 | -10.87  | 0.2599086374 | 7.93134 |
| 7.96668 | -17.37  | 0.261254354  | 7.96668 |
| 8.02835 | -25.96  | 0.2636026941 | 8.02835 |
| 8.09001 | -23.8   | 0.2659506534 | 8.09001 |
| 8.09719 | -15.97  | 0.2662240616 | 8.09719 |
| 8.15168 | -12.15  | 0.2682989936 | 8.15168 |
| 8.20775 | 1.86    | 0.2704340906 | 8.20775 |
| 8.21335 | -26.28  | 0.2706473337 | 8.21335 |
| 8.27501 | -15.99  | 0.272995293  | 8.27501 |
| 8.33668 | -15.69  | 0.2753436332 | 8.33668 |
| 8.37359 | -16.98  | 0.276749134  | 8.37359 |
| 8.39835 | -7.71   | 0.2776919733 | 8.39835 |
| 8.46002 | -21.69  | 0.2800403134 | 8.46002 |
| 8.48415 | -9.91   | 0.2809591629 | 8.48415 |
| 8.52169 | -28.42  | 0.2823886536 | 8.52169 |
| 8.58335 | -21.21  | 0.2847366129 | 8.58335 |
| 8.64502 | -14.66  | 0.287084953  | 8.64502 |
| 8.65    | -39.69  | 0.2872745871 | 8.65    |
| 8.85124 | -26.29  | 0.3310961083 | 8.85124 |
| 9.07016 | -13.35  | 0.3787675822 | 9.07016 |
| 9.63121 | -26.94  | 0.5009404329 | 9.63121 |
| 9.92557 | -26.23  | 0.5650395333 | 9.92557 |
| 10.05   | -54.36  | 0.5921351002 | 10.05   |
| 10.5092 | -26.42  | 0.7690625623 | 10.5092 |
| 10.85   | -41.09  | 0.9003710968 | 10.85   |
| 10.9097 | -26.9   | 0.9233732081 | 10.9097 |
| 11.65   | -63.26  | 1.2086070935 | 11.65   |
| 12.45   | -77.02  | 1.5168430901 | 12.45   |
| 13.1536 | -72.82  | 1.991901138  | 13.1536 |
| 13.8571 | -75.37  | 2.4668916676 | 13.8571 |
| 17.45   | -87.07  | 3.6703447263 | 17.45   |
| 23.085  | -115.74 | 5.009605185  | 23.085  |

|         |         |              |         |
|---------|---------|--------------|---------|
| 26.0553 | -99.13  | 3.3425333753 | 26.0553 |
| 26.9694 | -104.88 | 2.8294975402 | 26.9694 |
| 27.2725 | -97.83  | 2.6593835903 | 27.2725 |
| 27.5748 | -102    | 2.4897186379 | 27.5748 |
| 27.8762 | -105.64 | 2.3205588077 | 27.8762 |
| 28.1767 | -103.92 | 2.1519040999 | 28.1767 |
| 28.4763 | -105.31 | 1.9837545143 | 28.4763 |
| 28.7749 | -99.82  | 1.8161661756 | 28.7749 |
| 29.0726 | -106.44 | 1.6490829592 | 29.0726 |
| 29.3693 | -108.08 | 1.4825609897 | 29.3693 |
| 29.6651 | -104.99 | 1.3165441425 | 29.6651 |
| 29.9598 | -106.95 | 1.1511446669 | 29.9598 |
| 30.1953 | -92.91  | 1.0189710107 | 30.1953 |
| 30.2535 | -103.79 | 0.9863064383 | 30.2535 |
| 30.4135 | -92.31  | 0.8965069266 | 30.4135 |
| 30.468  | -90.51  | 0.8659189679 | 30.468  |
| 30.5461 | -103.28 | 0.8220855813 | 30.5461 |
| 30.7097 | -96.7   | 0.7302655806 | 30.7097 |
| 30.7406 | -91.97  | 0.7129230499 | 30.7406 |
| 30.8325 | -97.55  | 0.6613444554 | 30.8325 |
| 30.9549 | -101.36 | 0.592647829  | 30.9549 |
| 30.9587 | -88.96  | 0.5905150906 | 30.9587 |
| 31.0768 | -94.78  | 0.524231826  | 31.0768 |
| 31.1727 | -79.43  | 0.5253095517 | 31.1727 |
| 31.2419 | -80.33  | 0.5260872224 | 31.2419 |
| 31.2681 | -87.76  | 0.5263816584 | 31.2681 |
| 31.3632 | -83.69  | 0.5274503937 | 31.3632 |
| 31.4578 | -90.95  | 0.5285135099 | 31.4578 |
| 31.5521 | -85.19  | 0.5295732548 | 31.5521 |
| 31.6459 | -73.19  | 0.5306273807 | 31.6459 |
| 31.6571 | -90.8   | 0.5307532464 | 31.6571 |
| 31.7394 | -83.88  | 0.5316781351 | 31.7394 |
| 31.8324 | -92.1   | 0.5327232706 | 31.8324 |
| 31.925  | -77.4   | 0.5337639108 | 31.925  |
| 32.0172 | -83.14  | 0.5348000558 | 32.0172 |
| 32.109  | -85.01  | 0.5358317057 | 32.109  |
| 32.2004 | -86.29  | 0.5368588603 | 32.2004 |
| 32.2799 | -81.97  | 0.5377522825 | 32.2799 |
| 32.2913 | -81.64  | 0.5378803959 | 32.2913 |
| 32.3817 | -78.86  | 0.5388963125 | 32.3817 |
| 32.4718 | -87.19  | 0.5399088577 | 32.4718 |
| 32.5614 | -72.59  | 0.5409157839 | 32.5614 |
| 32.6505 | -94.63  | 0.5419170911 | 32.6505 |
| 32.7392 | -80.85  | 0.5429139031 | 32.7392 |
| 32.7935 | -87.52  | 0.5435241273 | 32.7935 |
| 32.8275 | -90.13  | 0.5439062199 | 32.8275 |
| 33.0027 | -84.46  | 0.5458751202 | 33.0027 |
| 33.0896 | -91.11  | 0.5468517037 | 33.0896 |
| 33.262  | -77.4   | 0.5487891376 | 33.262  |
| 33.3475 | -81.25  | 0.549749988  | 33.3475 |
| 33.4326 | -95.38  | 0.5507063431 | 33.4326 |
| 33.5172 | -82.03  | 0.5516570792 | 33.5172 |
| 33.5641 | -85.94  | 0.5521841421 | 33.5641 |
| 33.6014 | -82.03  | 0.5526033201 | 33.6014 |
| 33.6851 | -79.43  | 0.553543942  | 33.6851 |
| 33.7684 | -88.16  | 0.5544800687 | 33.7684 |
| 33.8511 | -85.01  | 0.5554094526 | 33.8511 |

|         |        |              |         |
|---------|--------|--------------|---------|
| 33.9335 | -75.33 | 0.5563354651 | 33.9335 |
| 34.0777 | -87.7  | 0.5579559869 | 34.0777 |
| 34.0967 | -88.16 | 0.5581695092 | 34.0967 |
| 34.1777 | -86.84 | 0.5590797885 | 34.1777 |
| 34.2061 | -88.28 | 0.5593989481 | 34.2061 |
| 34.3382 | -90.48 | 0.56088349   | 34.3382 |
| 34.4178 | -85.74 | 0.561778036  | 34.4178 |
| 34.4969 | -89.29 | 0.562666963  | 34.4969 |
| 34.5756 | -90.95 | 0.5635513949 | 34.5756 |
| 34.6538 | -94.63 | 0.5644302077 | 34.6538 |
| 34.7316 | -89.44 | 0.5653045253 | 34.7316 |
| 34.8089 | -88.84 | 0.5661732239 | 34.8089 |
| 34.9389 | -76.48 | 0.577025801  | 34.9389 |
| 35.0634 | -72.99 | 0.5874192306 | 35.0634 |
| 35.3166 | -85.01 | 0.6085567116 | 35.3166 |
| 35.5683 | -78.04 | 0.6295689704 | 35.5683 |
| 35.8186 | -77    | 0.6504643554 | 35.8186 |
| 36.0674 | -74.06 | 0.6712345184 | 36.0674 |
| 36.3148 | -70.15 | 0.6918878074 | 36.3148 |
| 36.5609 | -70.9  | 0.7124325707 | 36.5609 |
| 36.64   | -82.19 | 0.7190359465 | 36.64   |
| 36.8055 | -68.39 | 0.7328521119 | 36.8055 |
| 37.0487 | -64.61 | 0.7531547792 | 37.0487 |
| 37.2905 | -72.99 | 0.7733405726 | 37.2905 |
| 37.531  | -79.05 | 0.7934178403 | 37.531  |
| 37.7702 | -86.29 | 0.8133865821 | 37.7702 |
| 38.008  | -90.48 | 0.8332384501 | 38.008  |
| 38.2445 | -93.84 | 0.8529817923 | 38.2445 |
| 38.4797 | -85.92 | 0.8726166087 | 38.4797 |
| 38.7136 | -82.23 | 0.8921428994 | 38.7136 |
| 38.9463 | -79.63 | 0.9115690124 | 38.9463 |
| 39.1777 | -87.37 | 0.9308865996 | 39.1777 |
| 39.1916 | -80.26 | 0.9320469906 | 39.1916 |
| 39.4079 | -84.83 | 0.9501040092 | 39.4079 |
| 39.6369 | -85.19 | 0.9692212412 | 39.6369 |
| 39.8646 | -81.25 | 0.9882299474 | 39.8646 |
| 40.0912 | -85.55 | 1.0071468241 | 40.0912 |
| 40.3167 | -80.25 | 1.0259718713 | 40.3167 |
| 40.541  | -79.24 | 1.0446967409 | 40.541  |
| 40.7643 | -85.74 | 1.0633381291 | 40.7643 |
| 40.865  | -90.95 | 1.0717447023 | 40.865  |
| 40.9864 | -77.4  | 1.0818793397 | 40.9864 |
| 41.2075 | -76.6  | 1.1003370689 | 41.2075 |
| 41.4275 | -68.64 | 1.1187029686 | 41.4275 |
| 41.6466 | -88.55 | 1.1369937351 | 41.6466 |
| 41.8646 | -82.03 | 1.155192672  | 41.8646 |
| 42.0817 | -88.99 | 1.1733164758 | 42.0817 |
| 42.2979 | -84.46 | 1.1913651463 | 42.2979 |
| 42.5131 | -83.88 | 1.2093303355 | 42.5131 |
| 42.7275 | -84.08 | 1.2272287396 | 42.7275 |
| 42.941  | -74.29 | 1.2450520104 | 42.941  |
| 43.1537 | -68.89 | 1.2628084962 | 43.1537 |
| 43.3656 | -86.84 | 1.2804981969 | 43.3656 |
| 43.3752 | -74.49 | 1.281299618  | 43.3752 |
| 43.5767 | -88.84 | 1.2981211125 | 43.5767 |
| 43.7871 | -86.48 | 1.3156855911 | 43.7871 |
| 43.9967 | -78.66 | 1.3331832847 | 43.9967 |

|         |         |              |         |
|---------|---------|--------------|---------|
| 44.1316 | -78.81  | 1.3444449204 | 44.1316 |
| 44.2057 | -77.2   | 1.3506308894 | 44.2057 |
| 44.4141 | -80.04  | 1.3680284053 | 44.4141 |
| 44.6218 | -80.25  | 1.3853674842 | 44.6218 |
| 44.829  | -78.04  | 1.4026648225 | 44.829  |
| 45.0357 | -75.33  | 1.4199204201 | 45.0357 |
| 45.2418 | -68.64  | 1.4371259289 | 45.2418 |
| 45.2661 | -79.85  | 1.439154526  | 45.2661 |
| 45.4474 | -72.59  | 1.454289697  | 45.4474 |
| 45.6526 | -80.65  | 1.4714200725 | 45.6526 |
| 45.8575 | -72.12  | 1.4885254037 | 45.8575 |
| 46.0226 | -83.16  | 1.5023081766 | 46.0226 |
| 46.0619 | -78.25  | 1.5055889941 | 46.0619 |
| 46.266  | -70.9   | 1.5226275402 | 46.266  |
| 46.4699 | -65.72  | 1.5396493899 | 46.4699 |
| 46.6735 | -74.06  | 1.5566461953 | 46.6735 |
| 46.8768 | -84.83  | 1.5736179563 | 46.8768 |
| 47.08   | -85.55  | 1.5905813691 | 47.08   |
| 47.1571 | -83.19  | 1.5970177821 | 47.1571 |
| 47.2831 | -89.29  | 1.6075364338 | 47.2831 |
| 47.4861 | -90.95  | 1.6244831503 | 47.4861 |
| 47.689  | -79.84  | 1.6414215188 | 47.689  |
| 47.892  | -90.13  | 1.6583682353 | 47.892  |
| 47.9135 | -85.67  | 1.6601630846 | 47.9135 |
| 48.0949 | -92.43  | 1.6753066037 | 48.0949 |
| 48.298  | -101.49 | 1.6922616684 | 48.298  |
| 48.4051 | -86.48  | 1.7047587718 | 48.4051 |
| 48.568  | -86.29  | 1.723766971  | 48.568  |
| 48.6162 | -83.36  | 1.7293912509 | 48.6162 |
| 48.7311 | -82.03  | 1.7427985075 | 48.7311 |
| 48.8944 | -77.61  | 1.7618533812 | 48.8944 |
| 48.9371 | -85.9   | 1.7668358865 | 48.9371 |
| 49.0579 | -78.04  | 1.7809315922 | 49.0579 |
| 49.2218 | -78.04  | 1.8000564777 | 49.2218 |
| 49.3859 | -78.66  | 1.8192047005 | 49.3859 |
| 49.4184 | -77.95  | 1.8229970055 | 49.4184 |
| 49.5505 | -70.15  | 1.8384112665 | 49.5505 |
| 49.7154 | -81.05  | 1.8576528383 | 49.7154 |
| 49.7392 | -83.63  | 1.8604299724 | 49.7392 |
| 49.8807 | -74.52  | 1.8769410847 | 49.8807 |
| 50.0466 | -78.47  | 1.8962993428 | 50.0466 |
| 50.2129 | -75.75  | 1.9157042754 | 50.2129 |
| 50.2205 | -76.56  | 1.9165910914 | 50.2205 |
| 50.3798 | -76.6   | 1.9351792199 | 50.3798 |
| 50.5414 | -79.13  | 1.9540357269 | 50.5414 |
| 50.5473 | -61.96  | 1.9547241761 | 50.5473 |
| 50.6216 | -74.41  | 1.9633939686 | 50.6216 |
| 50.8843 | -67.32  | 1.9940474612 | 50.8843 |
| 51.0226 | -72.04  | 2.0101851773 | 51.0226 |
| 51.0539 | -74.06  | 2.0138374587 | 51.0539 |
| 51.2242 | -73.83  | 2.0337091365 | 51.2242 |
| 51.3053 | -75.29  | 2.0431723959 | 51.3053 |
| 51.3954 | -69.14  | 2.0536858321 | 51.3954 |
| 51.5674 | -72.12  | 2.0737558767 | 51.5674 |
| 51.7293 | -74.07  | 2.0926473896 | 51.7293 |
| 51.7403 | -65.72  | 2.093930939  | 51.7403 |
| 51.9142 | -63.59  | 2.1142226876 | 51.9142 |



|         |        |              |         |
|---------|--------|--------------|---------|
| 52.0052 | -80.16 | 2.1248411414 | 52.0052 |
| 52.089  | -64.93 | 2.1346194538 | 52.089  |
| 52.2649 | -60.34 | 2.155144575  | 52.2649 |
| 52.419  | -74.39 | 2.1731259347 | 52.419  |
| 52.4419 | -57.08 | 2.1757980511 | 52.4419 |
| 52.62   | -40.27 | 2.1965798822 | 52.62   |
| 52.7078 | -72.46 | 2.1952062592 | 52.7078 |
| 52.8301 | -41.81 | 2.1932928867 | 52.8301 |
| 53.0417 | -54.5  | 2.1899824239 | 53.0417 |
| 53.1927 | -74.42 | 2.1876200425 | 53.1927 |
| 53.2547 | -72.59 | 2.1866500582 | 53.2547 |
| 53.4692 | -68.12 | 2.1832942251 | 53.4692 |
| 53.516  | -68.8  | 2.1825620433 | 53.516  |
| 53.5968 | -79.33 | 2.1812979346 | 53.5968 |
| 53.6854 | -70.15 | 2.1799117956 | 53.6854 |
| 53.9033 | -70.15 | 2.1765027699 | 53.9033 |
| 54.0009 | -79.03 | 2.1749758267 | 54.0009 |
| 54.1229 | -61.96 | 2.1730671477 | 54.1229 |
| 54.3241 | -84.55 | 2.1699193919 | 54.3241 |
| 54.3443 | -70.65 | 2.1696033648 | 54.3443 |
| 54.5675 | -65.72 | 2.166111421  | 54.5675 |
| 54.7927 | -66.57 | 2.1625881873 | 54.7927 |
| 54.8899 | -83.53 | 2.1610675021 | 54.8899 |
| 54.8909 | -75.18 | 2.1610518572 | 54.8909 |
| 55.0198 | -75.54 | 2.1590352284 | 55.0198 |
| 55.0515 | -84.7  | 2.1585392848 | 55.0515 |
| 55.2489 | -57.66 | 2.1554509796 | 55.2489 |
| 55.4802 | -71.14 | 2.1518323121 | 55.4802 |
| 55.5364 | -79.35 | 2.1509530681 | 55.5364 |
| 55.5375 | -70.46 | 2.1509358587 | 55.5375 |
| 55.7136 | -70.65 | 2.1481807902 | 55.7136 |
| 55.9493 | -83.14 | 2.144493285  | 55.9493 |
| 56.1829 | -76.98 | 2.1408386342 | 56.1829 |
| 56.184  | -68.06 | 2.1408214248 | 56.184  |
| 56.1872 | -72.99 | 2.140771361  | 56.1872 |
| 56.4275 | -92.75 | 2.1370118893 | 56.4275 |
| 56.6702 | -80.65 | 2.1332148698 | 56.6702 |
| 56.8295 | -71.91 | 2.1307226357 | 56.8295 |
| 56.8305 | -70.17 | 2.1307069908 | 56.8305 |
| 56.9154 | -75.54 | 2.1293787379 | 56.9154 |
| 57.1631 | -51.74 | 2.1255034939 | 57.1631 |
| 57.4135 | -62.23 | 2.1215860085 | 57.4135 |
| 57.476  | -69.02 | 2.1206082017 | 57.476  |
| 57.4771 | -65.32 | 2.1205909923 | 57.4771 |
| 57.6665 | -66.57 | 2.1176278464 | 57.6665 |
| 57.9223 | -59.52 | 2.1136258786 | 57.9223 |
| 58.0948 | -62.41 | 2.1109271317 | 58.0948 |
| 58.0959 | -61.71 | 2.1109099223 | 58.0959 |
| 58.181  | -55.5  | 2.1095785405 | 58.181  |
| 58.4425 | -60.34 | 2.1054873966 | 58.4425 |
| 58.5668 | -66.37 | 2.1035427344 | 58.5668 |
| 58.5679 | -67.54 | 2.103525525  | 58.5679 |
| 58.707  | -66.57 | 2.1013493181 | 58.707  |
| 58.9745 | -69.14 | 2.0971643048 | 58.9745 |
| 59.0389 | -72.76 | 2.0961567726 | 59.0389 |
| 59.04   | -70.32 | 2.0961395632 | 59.04   |
| 59.2451 | -65.72 | 2.0929307923 | 59.2451 |

|         |         |              |         |
|---------|---------|--------------|---------|
| 59.511  | -73.62  | 2.0887708108 | 59.511  |
| 59.5121 | -68.44  | 2.0887536014 | 59.5121 |
| 59.5189 | -66.57  | 2.0886472161 | 59.5189 |
| 59.7959 | -57.39  | 2.0843135761 | 59.7959 |
| 60.0763 | -53.51  | 2.0799267435 | 60.0763 |
| 60.1011 | -65.89  | 2.0795387497 | 60.1011 |
| 60.1021 | -73.99  | 2.0795231048 | 60.1021 |
| 60.36   | -61.96  | 2.0754882827 | 60.36   |
| 60.4551 | -72.07  | 2.0740004518 | 60.4551 |
| 60.4562 | -72.01  | 2.0739832424 | 60.4562 |
| 60.5731 | -70.38  | 2.0721543525 | 60.5731 |
| 60.6472 | -74.52  | 2.0709950647 | 60.6472 |
| 60.9272 | -69.43  | 2.06661449   | 60.9272 |
| 60.9282 | -76.89  | 2.0665988451 | 60.9282 |
| 60.9379 | -64.13  | 2.0664470895 | 60.9379 |
| 61.2323 | -78.47  | 2.0618412281 | 61.2323 |
| 61.3992 | -71.72  | 2.0592300927 | 61.3992 |
| 61.4003 | -93.28  | 2.0592128833 | 61.4003 |
| 61.5304 | -62.77  | 2.0571774806 | 61.5304 |
| 61.8322 | -62.77  | 2.0524558469 | 61.8322 |
| 61.9395 | -95.39  | 2.0507771481 | 61.9395 |
| 61.9404 | -100.51 | 2.0506822827 | 61.9404 |
| 62.1021 | -93.84  | 2.0336381242 | 62.1021 |
| 62.2535 | -93.36  | 2.017679648  | 62.2535 |
| 62.3964 | -86.39  | 2.0026171233 | 62.3964 |
| 62.3972 | -97.12  | 2.0025327984 | 62.3972 |
| 62.405  | -81.64  | 2.0017106312 | 62.405  |
| 62.5564 | -86.84  | 1.9857521551 | 62.5564 |
| 62.7078 | -94     | 1.9697936789 | 62.7078 |
| 62.8593 | -104.31 | 1.9538246621 | 62.8593 |
| 62.9674 | -103.1  | 1.942430268  | 62.9674 |
| 62.9683 | -95.3   | 1.9423354025 | 62.9683 |
| 62.9692 | -101.34 | 1.9422405371 | 62.9692 |
| 63.0107 | -95.67  | 1.9378661859 | 63.0107 |
| 63.1622 | -97.13  | 1.9218971692 | 63.1622 |
| 63.3136 | -100.45 | 1.905938693  | 63.3136 |
| 63.4242 | -92.05  | 1.8942807837 | 63.4242 |
| 63.4251 | -102.14 | 1.8941859183 | 63.4251 |
| 63.4651 | -97.69  | 1.8899696762 | 63.4651 |
| 63.6165 | -101.23 | 1.8740112001 | 63.6165 |
| 63.7679 | -94.78  | 1.8580527239 | 63.7679 |
| 63.881  | -95.35  | 1.8461312995 | 63.881  |
| 63.8819 | -102.17 | 1.846036434  | 63.8819 |
| 63.9194 | -98.84  | 1.8420837071 | 63.9194 |
| 64.0708 | -100.84 | 1.826125231  | 64.0708 |
| 64.2223 | -101.49 | 1.8101562142 | 64.2223 |
| 64.3379 | -96.69  | 1.7979712746 | 64.3379 |
| 64.3387 | -103.32 | 1.7978869498 | 64.3387 |
| 64.3737 | -108.69 | 1.794197738  | 64.3737 |
| 64.5251 | -100.07 | 1.7782392618 | 64.5251 |
| 64.6766 | -94.48  | 1.7622702451 | 64.6766 |
| 64.7947 | -91.48  | 1.7498217904 | 64.7947 |
| 64.7956 | -104.3  | 1.749726925  | 64.7956 |
| 64.828  | -98.12  | 1.7463117689 | 64.828  |
| 64.9795 | -99.43  | 1.7303427521 | 64.9795 |
| 65.1309 | -98.69  | 1.714384276  | 65.1309 |
| 65.2515 | -97.59  | 1.7016723062 | 65.2515 |

|         |         |              |         |
|---------|---------|--------------|---------|
| 65.2524 | -94.25  | 1.7015774407 | 65.2524 |
| 65.2533 | -101.4  | 1.7014825753 | 65.2533 |
| 65.2824 | -101.87 | 1.6984152592 | 65.2824 |
| 65.4338 | -101.36 | 1.682456783  | 65.4338 |
| 65.5852 | -98.84  | 1.6664983068 | 65.5852 |
| 65.7083 | -96.9   | 1.6535228219 | 65.7083 |
| 65.7367 | -86.11  | 1.6505292901 | 65.7367 |
| 65.8881 | -95.82  | 1.6345708139 | 65.8881 |
| 66.0396 | -85.19  | 1.6186017971 | 66.0396 |
| 66.1651 | -91.33  | 1.6053733377 | 66.1651 |
| 66.166  | -97.2   | 1.6052784722 | 66.166  |
| 66.191  | -80.85  | 1.602643321  | 66.191  |
| 66.3425 | -95.82  | 1.5866743042 | 66.3425 |
| 66.4939 | -94.93  | 1.570715828  | 66.4939 |
| 66.622  | -88.69  | 1.5572133128 | 66.622  |
| 66.6229 | -97     | 1.5571184474 | 66.6229 |
| 66.6453 | -84.65  | 1.5547573518 | 66.6453 |
| 66.7968 | -80.45  | 1.5387883351 | 66.7968 |
| 66.9482 | -89.9   | 1.5228298589 | 66.9482 |
| 67.0788 | -92.23  | 1.5090638286 | 67.0788 |
| 67.0797 | -98.4   | 1.5089689632 | 67.0797 |
| 67.5356 | -100.48 | 1.4609143444 | 67.5356 |
| 67.5365 | -97.06  | 1.4608194789 | 67.5365 |
| 67.5374 | -100.02 | 1.4607246135 | 67.5374 |
| 67.9924 | -97.24  | 1.4127648601 | 67.9924 |
| 67.9933 | -98.29  | 1.4126699947 | 67.9933 |
| 68.3351 | -94.01  | 1.3766422063 | 68.3351 |
| 68.336  | -94.02  | 1.3765473409 | 68.336  |
| 68.9061 | -85.99  | 1.316455351  | 68.9061 |
| 68.907  | -90.88  | 1.3163604856 | 68.907  |
| 69.081  | -83.26  | 1.2980198327 | 69.081  |
| 69.4762 | -77.67  | 1.2563633612 | 69.4762 |
| 69.4771 | -85.63  | 1.2562684957 | 69.4771 |
| 69.9291 | -78.3   | 1.2086249605 | 69.9291 |
| 69.93   | -84.01  | 1.2085300951 | 69.93   |
| 70.08   | -82.53  | 1.1927191874 | 70.08   |
| 70.9186 | -70.44  | 1.2466808628 | 70.9186 |
| 70.9203 | -78.71  | 1.2467902533 | 70.9203 |
| 71.7483 | -49.5   | 1.3000698469 | 71.7483 |
| 72.0367 | -60.01  | 1.3186276184 | 72.0367 |
| 72.0383 | -73.04  | 1.3187305742 | 72.0383 |
| 73.1548 | -54.93  | 1.390574374  | 73.1548 |
| 73.1564 | -70.88  | 1.3906773298 | 73.1564 |
| 74.0493 | -72.63  | 1.4481330655 | 74.0493 |
| 74.2728 | -63.02  | 1.4625146949 | 74.2728 |
| 74.2745 | -78.15  | 1.4626240854 | 74.2745 |
| 75.6704 | -70.89  | 1.5524465308 | 75.6704 |
| 75.9499 | -47.03  | 1.570431611  | 75.9499 |
| 75.9516 | -69.07  | 1.5705410014 | 75.9516 |
| 76.3502 | -35.09  | 1.5961898493 | 76.3502 |
| 77.068  | -49.45  | 1.6423783666 | 77.068  |
| 77.0696 | -59.44  | 1.6424813223 | 77.0696 |
| 78.1861 | -42.2   | 1.7143251222 | 78.1861 |
| 78.1877 | -60.01  | 1.7144280779 | 78.1877 |
| 79.0346 | -70.22  | 1.7689238362 | 79.0346 |
| 79.3041 | -41.12  | 1.7862654431 | 79.3041 |
| 79.305  | -66.39  | 1.7862147967 | 79.305  |

|         |        |              |         |
|---------|--------|--------------|---------|
| 79.7162 | -43.82 | 1.7630750438 | 79.7162 |
| 79.717  | -64.02 | 1.7630300248 | 79.717  |
| 80.2656 | -53.23 | 1.732158263  | 80.2656 |
| 80.2664 | -49.23 | 1.732113244  | 80.2664 |
| 80.2673 | -61.47 | 1.7320625977 | 80.2673 |
| 80.815  | -47.79 | 1.7012414822 | 80.815  |
| 80.8158 | -54.3  | 1.7011964632 | 80.8158 |
| 81.3644 | -31.23 | 1.6703247013 | 81.3644 |
| 81.3652 | -49.98 | 1.6702796824 | 81.3652 |
| 81.9138 | -31.94 | 1.6394079205 | 81.9138 |
| 81.9147 | -53.23 | 1.6393572742 | 81.9147 |
| 82.4632 | -36.58 | 1.6084911397 | 82.4632 |
| 82.4641 | -49.19 | 1.6084404934 | 82.4641 |
| 83.0126 | -43.59 | 1.5775743589 | 83.0126 |
| 83.0135 | -32.95 | 1.5775237125 | 83.0135 |
| 83.0143 | -40.98 | 1.5774786936 | 83.0143 |
| 83.5059 | -42.22 | 1.5498145337 | 83.5059 |
| 83.6307 | -30.65 | 1.5427915736 | 83.6307 |
| 83.6315 | -43.07 | 1.5427465546 | 83.6315 |
| 84.2488 | -27.45 | 1.5080087884 | 84.2488 |
| 84.2496 | -32.11 | 1.5079637694 | 84.2496 |
| 84.3862 | -40.93 | 1.5002767795 | 84.3862 |
| 84.7295 | -45.66 | 1.480958012  | 84.7295 |
| 84.8669 | -48.57 | 1.4732260031 | 84.8669 |
| 84.9356 | -38.96 | 1.4693599986 | 84.9356 |
| 85.0042 | -26.92 | 1.4654996216 | 85.0042 |
| 85.2396 | -29.9  | 1.4522527883 | 85.2396 |
| 85.5536 | -33.96 | 1.4345828408 | 85.5536 |
| 86.103  | -58.24 | 1.403660599  | 86.103  |
| 86.3777 | -58.74 | 1.3882076695 | 86.3777 |
| 86.7898 | -75.28 | 1.3650172702 | 86.7898 |
| 87.0645 | -50.6  | 1.3495588798 | 87.0645 |
| 87.2649 | -79.96 | 1.3382816267 | 87.2649 |
| 87.4766 | -80.51 | 1.3263684805 | 87.4766 |
| 87.6826 | -67.14 | 1.3147760946 | 87.6826 |
| 88.0574 | -63.78 | 1.2936847049 | 88.0574 |
| 88.1222 | -79.03 | 1.290038168  | 88.1222 |
| 88.7793 | -75.85 | 1.3516410285 | 88.7793 |
| 89.0422 | -63.72 | 1.3762877976 | 89.0422 |
| 89.4365 | -63.65 | 1.4132532639 | 89.4365 |
| 89.6993 | -46.13 | 1.4378906581 | 89.6993 |
| 89.8233 | -63.26 | 1.4495156082 | 89.8233 |
| 90.0936 | -59.65 | 1.4748561244 | 90.0936 |
| 90.2908 | -48.83 | 1.493343545  | 90.2908 |
| 90.3565 | -48.5  | 1.4995028935 | 90.3565 |
| 90.7508 | -57.64 | 1.5364683598 | 90.7508 |
| 91.0136 | -47.43 | 1.561105754  | 91.0136 |
| 91.1488 | -52.59 | 1.5737806996 | 91.1488 |
| 91.4079 | -57.27 | 1.5980712202 | 91.4079 |
| 91.6707 | -49.44 | 1.6227086144 | 91.6707 |
| 92.065  | -59.94 | 1.6596740807 | 92.065  |
| 92.3279 | -52.18 | 1.6843208499 | 92.3279 |
| 92.7222 | -59.2  | 1.7212863161 | 92.7222 |
| 92.9193 | -56.46 | 1.7397643618 | 92.9193 |
| 92.985  | -46.39 | 1.7459237103 | 92.985  |
| 93.3793 | -58.32 | 1.7828891766 | 93.3793 |
| 93.5692 | -48.66 | 1.8006922251 | 93.5692 |

|         |        |              |         |
|---------|--------|--------------|---------|
| 93.6421 | -48.81 | 1.8075265708 | 93.6421 |
| 94.0364 | -57.8  | 1.8444920371 | 94.0364 |
| 94.2993 | -48    | 1.8691388062 | 94.2993 |
| 94.6936 | -57.19 | 1.9061042725 | 94.6936 |
| 94.9564 | -41.88 | 1.9307416667 | 94.9564 |
| 95.3507 | -54.06 | 1.9677071329 | 95.3507 |
| 95.5478 | -41.56 | 1.9861851786 | 95.5478 |
| 95.6135 | -33.35 | 1.9923445271 | 95.6135 |
| 95.9783 | -54.42 | 2.0265443803 | 95.9783 |
| 96.0078 | -55.27 | 2.0293099934 | 96.0078 |
| 96.2707 | -37.97 | 2.0539567626 | 96.2707 |
| 96.665  | -54.57 | 2.0909222288 | 96.665  |
| 96.9278 | -35.83 | 2.115559623  | 96.9278 |
| 97.3221 | -50.52 | 2.1525250893 | 97.3221 |
| 97.585  | -30.98 | 2.1771718585 | 97.585  |
| 97.942  | -43.09 | 2.2106404647 | 97.942  |
| 97.9792 | -50.6  | 2.2141279498 | 97.9792 |
| 98.1764 | -37.74 | 2.2326153704 | 98.1764 |
| 98.2421 | -30.21 | 2.2387747189 | 98.2421 |
| 98.6364 | -45.58 | 2.2757401852 | 98.6364 |
| 98.8992 | -33.37 | 2.3003775794 | 98.8992 |
| 99.2935 | -43.91 | 2.3373430457 | 99.2935 |
| 99.5564 | -33.49 | 2.3619898148 | 99.5564 |
| 99.9506 | -45.03 | 2.3989459061 | 99.9506 |
| 100.117 | -32.29 | 2.4145458391 | 100.117 |
| 100.213 | -32.81 | 2.4235458005 | 100.213 |
| 100.608 | -40.33 | 2.4605768915 | 100.608 |
| 100.805 | -41.41 | 2.4790455622 | 100.805 |
| 100.982 | -17.85 | 2.4562156086 | 100.982 |
| 102.043 | -40.02 | 2.31936487   | 102.043 |
| 102.751 | -12.29 | 2.2280450557 | 102.751 |
| 103.812 | -36.99 | 2.0911943171 | 103.812 |
| 104.52  | -17.62 | 1.9998745029 | 104.52  |
| 105.377 | -51.04 | 1.8893362531 | 105.377 |
| 105.459 | -43.33 | 1.8796133073 | 105.459 |
| 105.74  | -19.4  | 1.8462944319 | 105.74  |
| 106.163 | -47.82 | 1.7961382601 | 106.163 |
| 106.374 | -31.04 | 1.7711194605 | 106.374 |
| 106.444 | -25.12 | 1.7628193848 | 106.444 |
| 106.867 | -33.26 | 1.712663213  | 106.867 |
| 107.148 | -12.03 | 1.6793443376 | 107.148 |
| 107.464 | -38.87 | 1.6418754244 | 107.464 |
| 107.57  | -31.34 | 1.6293067383 | 107.57  |
| 107.852 | -1.77  | 1.5958692904 | 107.852 |
| 108.274 | -36.8  | 1.5458316911 | 108.274 |
| 108.556 | -36.1  | 1.5123942433 | 108.556 |
| 108.978 | -56.74 | 1.462356644  | 108.978 |
| 109.189 | -39.19 | 1.4373378443 | 109.189 |
| 109.26  | -48.82 | 1.4289191961 | 109.26  |
| 109.548 | -55.27 | 1.3947703132 | 109.548 |
| 109.682 | -70.83 | 1.3788815968 | 109.682 |
| 109.982 | -46.87 | 1.384402848  | 109.982 |
| 110.433 | -64.75 | 1.3927031291 | 110.433 |
| 110.778 | -30.24 | 1.399052568  | 110.778 |
| 111.251 | -38.94 | 1.4077577408 | 111.251 |
| 111.295 | -55.35 | 1.4085675243 | 111.295 |
| 111.64  | -27.16 | 1.4149169633 | 111.64  |

|         |        |              |         |
|---------|--------|--------------|---------|
| 112.157 | -51.15 | 1.4244319196 | 112.157 |
| 112.416 | -34.72 | 1.4291985998 | 112.416 |
| 112.502 | -29.94 | 1.4307813585 | 112.502 |
| 112.52  | -44.94 | 1.4311126336 | 112.52  |
| 113.019 | -47.26 | 1.4402963148 | 113.019 |
| 113.364 | -28.54 | 1.4466457537 | 113.364 |
| 113.365 | -28.26 | 1.4466641579 | 113.365 |
| 113.882 | -46.18 | 1.4561791142 | 113.882 |
| 114.226 | -27.24 | 1.462510149  | 114.226 |
| 114.744 | -48.66 | 1.4720435095 | 114.744 |
| 115.089 | -18.35 | 1.4783929484 | 115.089 |
| 115.175 | -36.29 | 1.4799757071 | 115.175 |
| 115.606 | -43.54 | 1.4879079047 | 115.606 |
| 115.865 | -34.03 | 1.4926745849 | 115.865 |
| 115.951 | -19.86 | 1.4942573436 | 115.951 |
| 116.111 | -44.37 | 1.497202011  | 116.111 |
| 116.468 | -36.62 | 1.5037722999 | 116.468 |
| 116.813 | -23.82 | 1.5101217389 | 116.813 |
| 117.33  | -33.39 | 1.5196366952 | 117.33  |
| 117.675 | -22.68 | 1.5259861341 | 117.675 |
| 118.192 | -27.43 | 1.5355010904 | 118.192 |
| 118.433 | -46.29 | 1.5399364956 | 118.433 |
| 118.537 | -13.08 | 1.5418505293 | 118.537 |
| 119.054 | -31.77 | 1.5513654857 | 119.054 |
| 119.313 | -18.03 | 1.5561321659 | 119.313 |
| 119.399 | -15.94 | 1.5577149246 | 119.399 |
| 119.917 | -23.56 | 1.5672482851 | 119.917 |
| 120.262 | -11.31 | 1.573597724  | 120.262 |
| 120.523 | -10.83 | 1.5784012126 | 120.523 |
| 120.779 | -18.66 | 1.5831126803 | 120.779 |
| 121.124 | 3.02   | 1.5894621192 | 121.124 |
| 121.641 | -23.47 | 1.5989770756 | 121.641 |
| 121.972 | -11.22 | 1.6050688561 | 121.972 |
| 121.986 | -11.14 | 1.6053265145 | 121.986 |
| 122.503 | -16.1  | 1.6148414708 | 122.503 |
| 122.504 | -22.16 | 1.614859875  | 122.504 |
| 122.676 | -3.3   | 1.6180253923 | 122.676 |
| 122.762 | -9.12  | 1.619608151  | 122.762 |
| 122.848 | -10.24 | 1.6211909097 | 122.848 |
| 123.02  | -5.62  | 1.6243564271 | 123.02  |
| 123.193 | -0.67  | 1.6275403487 | 123.193 |
| 123.365 | -8.46  | 1.630705866  | 123.365 |
| 123.366 | -21.59 | 1.6307242702 | 123.366 |
| 123.42  | -17.14 | 1.6317180954 | 123.42  |
| 123.538 | 7.15   | 1.6338897876 | 123.538 |
| 123.71  | -0.88  | 1.637055305  | 123.71  |
| 123.783 | -0.17  | 1.6383988094 | 123.783 |
| 123.883 | 2.59   | 1.6402392265 | 123.883 |
| 124.055 | 1.46   | 1.6434047439 | 124.055 |
| 124.145 | -7.93  | 1.6450611193 | 124.145 |
| 124.227 | 5.46   | 1.6465702613 | 124.227 |
| 124.228 | -17.69 | 1.6465886654 | 124.228 |
| 124.326 | 1.65   | 1.6483922742 | 124.326 |
| 124.507 | -11.27 | 1.6517234291 | 124.507 |
| 124.572 | -1.78  | 1.6529197002 | 124.572 |
| 124.745 | -2.81  | 1.6561036218 | 124.745 |
| 124.869 | -8.69  | 1.6583857389 | 124.869 |

|         |        |              |         |
|---------|--------|--------------|---------|
| 125.09  | -12.63 | 1.6624530607 | 125.09  |
| 125.231 | -3.89  | 1.6650480488 | 125.231 |
| 125.594 | 0.53   | 1.6717287628 | 125.594 |
| 125.952 | -6.95  | 1.6783174559 | 125.952 |
| 125.956 | 7.06   | 1.6783910726 | 125.956 |
| 126.318 | -3.54  | 1.6850533824 | 126.318 |
| 126.68  | -4.28  | 1.6917156923 | 126.68  |
| 127.042 | 3.79   | 1.6983780021 | 127.042 |
| 127.405 | 8.47   | 1.7050587161 | 127.405 |
| 127.767 | 7.03   | 1.711721026  | 127.767 |
| 127.948 | 16.11  | 1.7150521809 | 127.948 |
| 128.129 | 12.33  | 1.7183833358 | 128.129 |
| 128.491 | -0.26  | 1.7250456456 | 128.491 |
| 128.853 | -3.22  | 1.7317079555 | 128.853 |
| 129.216 | 7      | 1.7383886695 | 129.216 |
| 129.578 | 11.6   | 1.7450509793 | 129.578 |
| 129.94  | -6.2   | 1.7517132891 | 129.94  |
| 130.121 | -12.49 | 1.7550444444 | 130.121 |
| 130.262 | -3.06  | 1.7576394321 | 130.262 |
| 130.302 | -2.51  | 1.758375599  | 130.302 |
| 130.664 | -14.34 | 1.7650379088 | 130.664 |
| 131.027 | -14.35 | 1.7717186228 | 131.027 |
| 131.091 | -42.75 | 1.7728964897 | 131.091 |
| 131.249 | 4.32   | 1.7758043487 | 131.249 |
| 131.389 | -16.56 | 1.7783809326 | 131.389 |
| 131.407 | -26.39 | 1.7787122077 | 131.407 |
| 131.565 | -16.34 | 1.7816200667 | 131.565 |
| 131.724 | -16.68 | 1.7845463299 | 131.724 |
| 131.882 | 18.37  | 1.7874541888 | 131.882 |
| 131.883 | -34.91 | 1.787472593  | 131.883 |
| 131.906 | -20.96 | 1.7878958889 | 131.906 |
| 132.04  | -14.48 | 1.7903620478 | 132.04  |
| 132.113 | -25.29 | 1.7917055523 | 132.113 |
| 132.198 | -49.26 | 1.7932699068 | 132.198 |
| 132.629 | -36.47 | 1.8012021044 | 132.629 |
| 132.672 | -58.79 | 1.8019934838 | 132.672 |
| 132.909 | -68.54 | 1.8063552723 | 132.909 |
| 132.988 | -68.53 | 1.8078092018 | 132.988 |
| 133.058 | -41.16 | 1.8090974937 | 133.058 |
| 133.463 | -72.62 | 1.8165511829 | 133.463 |
| 133.488 | -51.6  | 1.8170112872 | 133.488 |
| 133.779 | -72.75 | 1.8223669009 | 133.779 |
| 133.917 | -55.76 | 1.8249066764 | 133.917 |
| 134.132 | -76.16 | 1.8288635732 | 134.132 |
| 134.253 | -75.99 | 1.8310904778 | 134.253 |
| 134.346 | -72.3  | 1.8328020657 | 134.346 |
| 134.57  | -76.75 | 1.8369246    | 134.57  |
| 134.776 | -76.4  | 1.8407158592 | 134.776 |
| 135.044 | -81.59 | 1.845648177  | 135.044 |
| 135.205 | -75.3  | 1.8486112485 | 135.205 |
| 135.635 | -73.49 | 1.8565250419 | 135.635 |
| 135.835 | -69.28 | 1.8150549085 | 135.835 |

\* Tie point unchanged from Grant et al. (2012) age, chosen at onset of sea level highstand for the interglacial

\* Tie point chosen using mean of ages from two Tahiti corals marking the end of MWP-2A

|         |         |              |              |
|---------|---------|--------------|--------------|
| 136.092 | -70.67  | 1.8815071137 | 134.40291722 |
| 136.104 | -82.68  | 1.8846099404 | 134.40966978 |
| 136.807 | -73.05  | 2.0663838713 | 134.80525692 |
| 137.027 | -80.16  | 2.1232690275 | 134.92905375 |
| 137.523 | -76.01  | 2.2515191978 | 135.20815934 |
| 138.238 | -78.83  | 2.4363959554 | 135.61049904 |
| 138.344 | -83.17  | 2.4638042579 | 135.6701466  |
| 138.954 | -46.76  | 2.6215312819 | 136.01340145 |
| 139.311 | -96.63  | 2.7138403763 | 136.21428995 |
| 139.661 | -84.48  | 2.8043394884 | 136.41123945 |
| 139.669 | -50.19  | 2.8064080395 | 136.41574115 |
| 140.385 | -60.68  | 2.991543366  | 136.81864357 |
| 140.51  | -35.94  | 3.0238644775 | 136.88898267 |
| 140.76  | -95.58  | 3.0885067004 | 137.02966089 |
|         |         |              |              |
| 140.885 | -78.87  | 3.1208278119 | 137.1        |
| 140.978 | -90.77  | 3.1448747188 | 137.38509514 |
| 141.26  | -93.07  | 3.2177911463 | 138.24957717 |
| 141.323 | -97.56  | 3.2340809865 | 138.44270613 |
| 141.385 | -96.36  | 3.2501122578 | 138.63276956 |
| 141.502 | -94.82  | 3.2543440042 | 138.99143763 |
| 141.589 | -99.48  | 3.2574906874 | 139.25813953 |
|         |         |              |              |
| 141.831 | -101.16 | 3.2662435303 | 140          |
| 142.553 | -92.61  | 3.2923573842 | 140.84031934 |
| 142.723 | -96.89  | 3.2985060755 | 141.03817847 |
| 143.275 | -89.56  | 3.318471238  | 141.68063868 |
| 143.543 | -99.61  | 3.328164469  | 141.99255777 |
| 143.997 | -87.86  | 3.3445850918 | 142.52095802 |
| 144.259 | -98.17  | 3.3540613102 | 142.82589385 |
| 144.286 | -97.54  | 3.3550378671 | 142.85731854 |
| 144.719 | -88.05  | 3.3706989456 | 143.36127737 |
| 144.975 | -79.82  | 3.3799581514 | 143.65922993 |
| 145.441 | -84.26  | 3.3968127994 | 144.20159671 |
| 145.73  | -91.39  | 3.4072655747 | 144.53795722 |
| 145.793 | -84.1   | 3.4095442073 | 144.61128148 |
| 146.164 | -89.6   | 3.422962822  | 145.04307992 |
| 146.609 | -85.67  | 3.4390579258 | 145.56100528 |
| 146.886 | -85.39  | 3.4490766758 | 145.88339927 |
| 147.102 | -91.14  | 3.4568891307 | 146.13479674 |
| 147.175 | -91.24  | 3.4595294511 | 146.21975978 |
| 147.319 | -87.41  | 3.4647377543 | 146.3873581  |
| 147.464 | -83.73  | 3.4699822263 | 146.55612029 |
| 147.608 | -93.13  | 3.4751905296 | 146.72371861 |
| 147.609 | -86.1   | 3.4752266984 | 146.72488248 |
| 147.627 | -93.06  | 3.4758777363 | 146.74583227 |
| 147.752 | -82.48  | 3.4803988329 | 146.89131692 |
| 147.897 | -94.21  | 3.4856433049 | 147.06007912 |
| 148.135 | -92.09  | 3.4942514728 | 147.33708189 |
| 148.186 | -95.3   | 3.4960960802 | 147.39643963 |
| 148.33  | -84.05  | 3.5013043834 | 147.56403795 |
| 148.475 | -82.36  | 3.5065488554 | 147.73280014 |
| 148.619 | -90.03  | 3.5117571587 | 147.90039846 |

\* Tie point chosen using mean of ages from four corals from Tahiti and Huon Peninsula marking the beginning of MWP-2A

\* Tie point chosen using estimated age of onset of RSL rise from linear age-depth model



|         |         |              |              |                                                          |
|---------|---------|--------------|--------------|----------------------------------------------------------|
| 148.845 | -95.57  | 3.5199313013 | 148.16343471 |                                                          |
| 148.908 | -90.92  | 3.522209934  | 148.23675897 |                                                          |
| 149.052 | -83.72  | 3.5274182372 | 148.40435729 |                                                          |
| 149.053 | -88.34  | 3.527454406  | 148.40552117 |                                                          |
| 149.197 | -90.51  | 3.5326627092 | 148.57311948 |                                                          |
| 149.341 | -94.75  | 3.5378710125 | 148.7407178  |                                                          |
| 149.413 | -87.65  | 3.5404751641 | 148.82451696 |                                                          |
| 149.63  | -90.04  | 3.5483237878 | 149.07707831 |                                                          |
| 149.775 | -96.17  | 3.5535682598 | 149.24584051 |                                                          |
| 150.16  | -89.69  | 3.5674932373 | 149.69393323 |                                                          |
| 150.497 | -95.22  | 3.5796821136 | 150.08615985 |                                                          |
| 151.066 | -95     | 3.6002621452 | 150.74840598 |                                                          |
| 151.219 | -98.52  | 3.6057959674 | 150.92647919 |                                                          |
| 151.769 | -100.79 | 3.6256887924 | 151.56661165 |                                                          |
| 151.921 | -98.72  | 3.6311864458 | 151.74352099 |                                                          |
| 152.463 | -86.21  | 3.6507899205 | 152.37434243 |                                                          |
| 152.625 | -90.43  | 3.6566492617 | 152.56289054 |                                                          |
| 153.004 | -87.82  | 3.6703572265 | 153.004      | * Tie point chosen to match age from Grant et al. (2012) |
