# Supplementary material for: The penultimate deglaciation: protocol for Paleoclimate Modelling Intercomparison Project (PMIP) phase 4 transient numerical simulations between 140 and 127 ka, version 1.0
Source: Copernicus journal article supplement (doi:10.5194/gmd-12-3649-2019), 2019-08-22
Supplement: Supplementary file 2 [file gmd-12-3649-2019-supplement.zip]

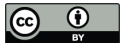

## *Supplement of*

# **The penultimate deglaciation: protocol for Paleoclimate Modelling Intercomparison Project (PMIP) phase 4 transient numerical simulations between 140 and 127 ka, version 1.0**

**Laurie Menviel et al.**

*Correspondence to:* Laurie Menviel ([l.menviel@unsw.edu.au](mailto:l.menviel@unsw.edu.au)) and Emilie Capron ([capron@nbi.ku.dk](mailto:capron@nbi.ku.dk))

- [gmd-12-3649-2019-supplement-title-page.pdf](#)
- SuppM
  - [T2-SI-Feb2019-combined.pdf](#)
  - [T2-fwfFlux.txt](#)
  - [TopoIcem-140-122k.nc](#)

The copyright of individual parts of the supplement might differ from the CC BY 4.0 License.
